# Supplementary material
Source: PubMed Central journal article supplement (PMC10659932)
Supplement: PRO-32-e4814-s001.pdf [file PRO-32-e4814-s001.pdf]

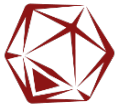

# Stanford University HIV DRUG RESISTANCE DATABASE

A curated public database to represent, store and analyze HIV drug resistance data.

## 1. Y181C-H01

### Sequence summary

Sequence includes PR: codons 1 - 99  
 Sequence includes RT: codons 1 - 560  
 Sequence includes IN: codons 1 - 288  
 Subtype: ☒ B (1.16%)  
 PR SDRMs: None  
 RT SDRMs: V106A, Y181C  
 IN SDRMs: None

### Sequence quality assessment

#### Protease (PR)

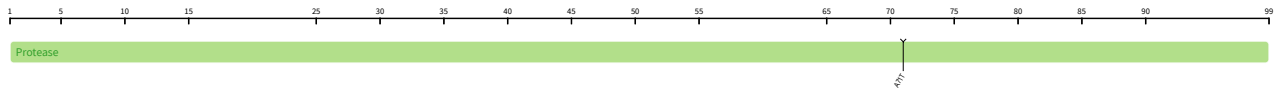

#### Reverse transcriptase (RT)

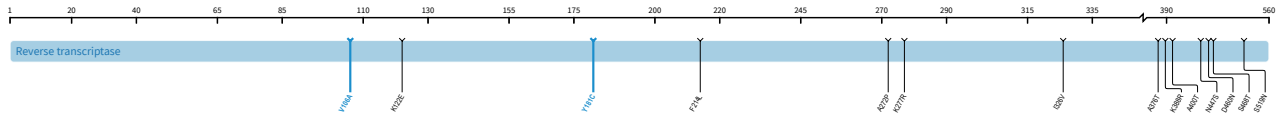

#### Integrase (IN)

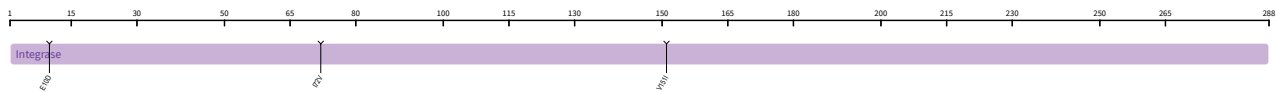

There are no known sequence quality issues.

### Drug resistance interpretation: PR

HIVDB 9.4 (2022-12-07)

PI Major Mutations: None  
 PI Accessory Mutations: None  
 PR Other Mutations: A71T

#### Protease Inhibitors

**atazanavir/r (ATV/r)** Susceptible  
**darunavir/r (DRV/r)** Susceptible  
**lopinavir/r (LPV/r)** Susceptible

**PR comments****Other**

- **A71V/T** are polymorphic, PI-selected accessory mutations that increase the replication of viruses with other PI-resistance mutations.

Mutation scoring: PR

HIVDB 9.4 (2022-12-07)

*No drug resistance mutations were found for PI.*

Drug resistance interpretation: RT

HIVDB 9.4 (2022-12-07)

NRTI Mutations:

None

NNRTI Mutations:

**V106A** • **Y181C**

RT Other Mutations:

K122E • F214L • A272P • K277R • I326V • A376T • K388R • A400T • N447S • D460N • S468T • S519N

**Nucleoside Reverse Transcriptase Inhibitors****Non-nucleoside Reverse Transcriptase Inhibitors**

|                            |             |                          |                         |
|----------------------------|-------------|--------------------------|-------------------------|
| <b>abacavir (ABC)</b>      | Susceptible | <b>doravirine (DOR)</b>  | High-Level Resistance   |
| <b>zidovudine (AZT)</b>    | Susceptible | <b>efavirenz (EFV)</b>   | High-Level Resistance   |
| <b>emtricitabine (FTC)</b> | Susceptible | <b>etravirine (ETR)</b>  | Intermediate Resistance |
| <b>lamivudine (3TC)</b>    | Susceptible | <b>nevirapine (NVP)</b>  | High-Level Resistance   |
| <b>tenofovir (TDF)</b>     | Susceptible | <b>rilpivirine (RPV)</b> | Intermediate Resistance |

**RT comments****NNRTI**

- **V106A** is a non-polymorphic mutation that confers high-level resistance to NVP and DOR, and intermediate resistance to EFV. It is commonly selected in vitro and in vivo by DOR.
- **Y181C** is a non-polymorphic mutation selected in persons receiving NVP, ETR and RPV. It confers high-level resistance to NVP, intermediate resistance to ETR and RPV, and low-level resistance to EFV. It does not significantly reduce DOR susceptibility.
- This virus is predicted to have intermediate-level reduced susceptibility to **RPV**. The use of the combination of CAB/**RPV** should be considered to be contraindicated.

Mutation scoring: RT

HIVDB 9.4 (2022-12-07)

*No drug resistance mutations were found for NRTI.**Drug resistance mutation scores of NNRTI:*

| Rule  | DOR | EFV | ETR | NVP | RPV |
|-------|-----|-----|-----|-----|-----|
| V106A | 60  | 45  | 0   | 60  | 0   |
| Y181C | 10  | 30  | 30  | 60  | 45  |
| Total | 70  | 75  | 30  | 120 | 45  |

Drug resistance interpretation: IN

HIVDB 9.4 (2022-12-07)

INSTI Major Mutations:

None

INSTI Accessory Mutations:

None

IN Other Mutations:

E10D • I72V • V151I

**Integrase Strand Transfer Inhibitors**

|                           |             |
|---------------------------|-------------|
| <b>bictegravir (BIC)</b>  | Susceptible |
| <b>cabotegravir (CAB)</b> | Susceptible |
| <b>dolutegravir (DTG)</b> | Susceptible |
| <b>elvitegravir (EVG)</b> | Susceptible |

**IN comments****Other**

- **V151I** is an accessory INSTI selected mutation that occurs in 1% to 3% of viruses from ART-naive persons depending on subtype. Alone, it appears to have little or no effect on INSTI susceptibility.

*No drug resistance mutations were found for INSTI.*

## 2. Y181C-H02

### Sequence summary

Sequence includes PR: codons 1 - 99  
Sequence includes RT: codons 1 - 560  
Sequence includes IN: codons 1 - 288  
Subtype: ☒ B (1.23%)  
PR SDRMs: None  
RT SDRMs: V106A, Y181C  
IN SDRMs: None

### Sequence quality assessment

#### Protease (PR)

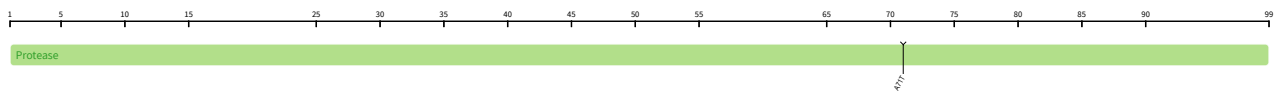

#### Reverse transcriptase (RT)

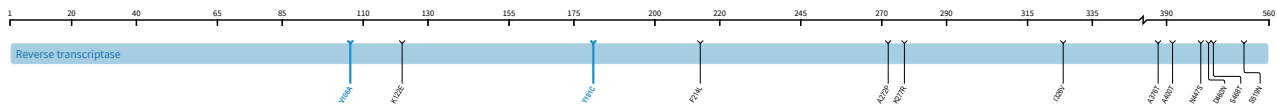

#### Integrase (IN)

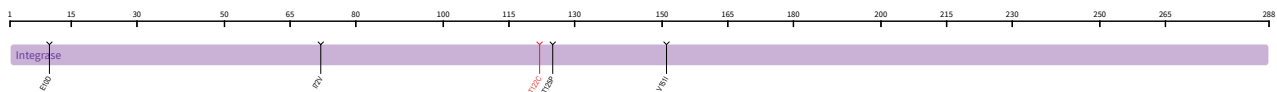

There are no known sequence quality issues.

Drug resistance interpretation: PR

HIVDB 9.4 (2022-12-07)

PI Major Mutations: None  
PI Accessory Mutations: None  
PR Other Mutations: A71T

#### Protease Inhibitors

**atazanavir/r (ATV/r)** Susceptible  
**darunavir/r (DRV/r)** Susceptible  
**lopinavir/r (LPV/r)** Susceptible

#### PR comments

Other

- **A71V/T** are polymorphic, PI-selected accessory mutations that increase the replication of viruses with other PI-resistance mutations.

Mutation scoring: PR

HIVDB 9.4 (2022-12-07)

No drug resistance mutations were found for PI.

Drug resistance interpretation: RT

HIVDB 9.4 (2022-12-07)

NRTI Mutations:

None

NNRTI Mutations:

**V106A** • **Y181C**

RT Other Mutations:

K122E • F214L • A272P • K277R • I326V • A376T • A400T • N447S • D460N • S468T • S519N

#### Nucleoside Reverse Transcriptase Inhibitors

#### Non-nucleoside Reverse Transcriptase Inhibitors

|                            | Susceptible |                          | High-Level Resistance   |
|----------------------------|-------------|--------------------------|-------------------------|
| <b>abacavir (ABC)</b>      | Susceptible | <b>doravirine (DOR)</b>  | High-Level Resistance   |
| <b>zidovudine (AZT)</b>    | Susceptible | <b>efavirenz (EFV)</b>   | High-Level Resistance   |
| <b>emtricitabine (FTC)</b> | Susceptible | <b>etravirine (ETR)</b>  | Intermediate Resistance |
| <b>lamivudine (3TC)</b>    | Susceptible | <b>nevirapine (NVP)</b>  | High-Level Resistance   |
| <b>tenofovir (TDF)</b>     | Susceptible | <b>rilpivirine (RPV)</b> | Intermediate Resistance |

#### RT comments

##### NNRTI

- **V106A** is a non-polymorphic mutation that confers high-level resistance to NVP and DOR, and intermediate resistance to EFV. It is commonly selected in vitro and in vivo by DOR.
- **Y181C** is a non-polymorphic mutation selected in persons receiving NVP, ETR and RPV. It confers high-level resistance to NVP, intermediate resistance to ETR and RPV, and low-level resistance to EFV. It does not significantly reduce DOR susceptibility.
- This virus is predicted to have intermediate-level reduced susceptibility to **RPV**. The use of the combination of CAB/**RPV** should be considered to be contraindicated.

Mutation scoring: RT

HIVDB 9.4 (2022-12-07)

No drug resistance mutations were found for NRTI.

Drug resistance mutation scores of NNRTI:

| Rule  | DOR | EFV | ETR | NVP | RPV |
|-------|-----|-----|-----|-----|-----|
| V106A | 60  | 45  | 0   | 60  | 0   |
| Y181C | 10  | 30  | 30  | 60  | 45  |
| Total | 70  | 75  | 30  | 120 | 45  |

Drug resistance interpretation: IN

HIVDB 9.4 (2022-12-07)

INSTI Major Mutations:

None

INSTI Accessory Mutations:

None

IN Other Mutations:

E10D • I72V • **T122C** • T125P • V151I

#### Integrase Strand Transfer Inhibitors

|                           |             |
|---------------------------|-------------|
| <b>bictegravir (BIC)</b>  | Susceptible |
| <b>cabotegravir (CAB)</b> | Susceptible |
| <b>dolutegravir (DTG)</b> | Susceptible |
| <b>elvitegravir (EVG)</b> | Susceptible |
| <b>raltegravir (RAL)</b>  | Susceptible |

#### IN comments

**Other**

- **V151I** is an accessory INSTI selected mutation that occurs in 1% to 3% of viruses from ART-naive persons depending on subtype. Alone, it appears to have little or no effect on INSTI susceptibility.

Mutation scoring: IN

HIVDB 9.4 (2022-12-07)

*No drug resistance mutations were found for INSTI.*

### 3. Y181C-H03

#### Sequence summary

Sequence includes PR: codons 1 - 99  
Sequence includes RT: codons 1 - 560  
Sequence includes IN: codons 1 - 288  
Subtype: ☒ B (1.30%)  
PR SDRMs: None  
RT SDRMs: V106A, Y181C  
IN SDRMs: None

#### Sequence quality assessment

##### Protease (PR)

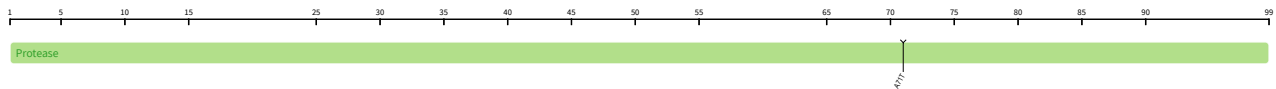

##### Reverse transcriptase (RT)

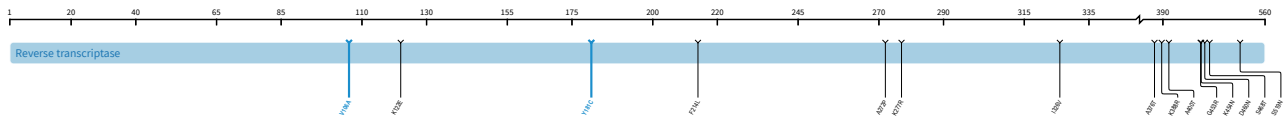

##### Integrase (IN)

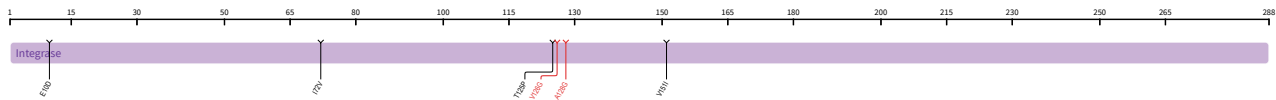

*There are no known sequence quality issues.*

Drug resistance interpretation: PR

HIVDB 9.4 (2022-12-07)

PI Major Mutations: None  
PI Accessory Mutations: None  
PR Other Mutations: A71T

#### Protease Inhibitors

**atazanavir/r (ATV/r)** Susceptible  
**darunavir/r (DRV/r)** Susceptible  
**lopinavir/r (LPV/r)** Susceptible

#### PR comments

Other

- **A71V/T** are polymorphic, PI-selected accessory mutations that increase the replication of viruses with other PI-resistance mutations.

Mutation scoring: PR

HIVDB 9.4 (2022-12-07)

No drug resistance mutations were found for PI.

Drug resistance interpretation: RT

HIVDB 9.4 (2022-12-07)

NRTI Mutations:

None

NNRTI Mutations:

**V106A** • **Y181C**

RT Other Mutations:

K122E • F214L • A272P • K277R • I326V • A376T • K388R • A400T • **G453R** • K454N • D460N • S468T • S519N

#### Nucleoside Reverse Transcriptase Inhibitors

#### Non-nucleoside Reverse Transcriptase Inhibitors

| Inhibitor                  | Resistance Level | Inhibitor                | Resistance Level        |
|----------------------------|------------------|--------------------------|-------------------------|
| <b>abacavir (ABC)</b>      | Susceptible      | <b>doravirine (DOR)</b>  | High-Level Resistance   |
| <b>zidovudine (AZT)</b>    | Susceptible      | <b>efavirenz (EFV)</b>   | High-Level Resistance   |
| <b>emtricitabine (FTC)</b> | Susceptible      | <b>etravirine (ETR)</b>  | Intermediate Resistance |
| <b>lamivudine (3TC)</b>    | Susceptible      | <b>nevirapine (NVP)</b>  | High-Level Resistance   |
| <b>tenofovir (TDF)</b>     | Susceptible      | <b>rilpivirine (RPV)</b> | Intermediate Resistance |

#### RT comments

##### NNRTI

- **V106A** is a non-polymorphic mutation that confers high-level resistance to NVP and DOR, and intermediate resistance to EFV. It is commonly selected in vitro and in vivo by DOR.
- **Y181C** is a non-polymorphic mutation selected in persons receiving NVP, ETR and RPV. It confers high-level resistance to NVP, intermediate resistance to ETR and RPV, and low-level resistance to EFV. It does not significantly reduce DOR susceptibility.
- This virus is predicted to have intermediate-level reduced susceptibility to **RPV**. The use of the combination of CAB/**RPV** should be considered to be contraindicated.

Mutation scoring: RT

HIVDB 9.4 (2022-12-07)

No drug resistance mutations were found for NRTI.

Drug resistance mutation scores of NNRTI:

| Rule  | DOR | EFV | ETR | NVP | RPV |
|-------|-----|-----|-----|-----|-----|
| V106A | 60  | 45  | 0   | 60  | 0   |
| Y181C | 10  | 30  | 30  | 60  | 45  |
| Total | 70  | 75  | 30  | 120 | 45  |

Drug resistance interpretation: IN

HIVDB 9.4 (2022-12-07)

INSTI Major Mutations:

None

INSTI Accessory Mutations:

None

IN Other Mutations:

E10D • I72V • T125P • **V126G** • **A128G** • V151I

#### Integrase Strand Transfer Inhibitors

|                           |             |
|---------------------------|-------------|
| <b>bictegravir (BIC)</b>  | Susceptible |
| <b>cabotegravir (CAB)</b> | Susceptible |
| <b>dolutegravir (DTG)</b> | Susceptible |
| <b>elvitegravir (EVG)</b> | Susceptible |
| <b>raltegravir (RAL)</b>  | Susceptible |

#### IN comments



**Other**

- **V151I** is an accessory INSTI selected mutation that occurs in 1% to 3% of viruses from ART-naive persons depending on subtype. Alone, it appears to have little or no effect on INSTI susceptibility.

Mutation scoring: IN

HIVDB 9.4 (2022-12-07)

*No drug resistance mutations were found for INSTI.*

## 4. Y181C-H04

### Sequence summary

Sequence includes PR: codons 1 - 99  
Sequence includes RT: codons 1 - 560  
Sequence includes IN: codons 1 - 288  
Subtype: ☒ B (1.37%)  
PR SDRMs: None  
RT SDRMs: V106A, Y181C  
IN SDRMs: None

### Sequence quality assessment

#### Protease (PR)



#### Reverse transcriptase (RT)

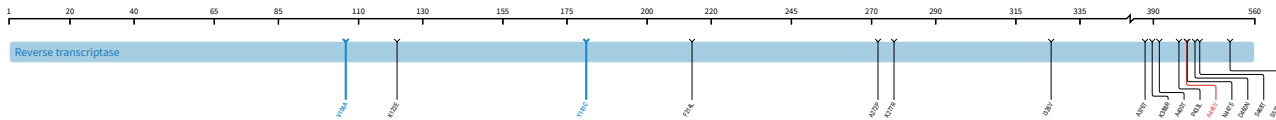

#### Integrase (IN)

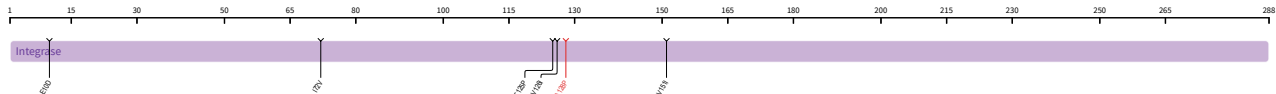

*There are no known sequence quality issues.*

Drug resistance interpretation: PR

HIVDB 9.4 (2022-12-07)

PI Major Mutations: None  
PI Accessory Mutations: None  
PR Other Mutations: A71T

#### Protease Inhibitors

**atazanavir/r (ATV/r)** Susceptible  
**darunavir/r (DRV/r)** Susceptible  
**lopinavir/r (LPV/r)** Susceptible

#### PR comments

Other

- **A71V/T** are polymorphic, PI-selected accessory mutations that increase the replication of viruses with other PI-resistance mutations.

Mutation scoring: PR

HIVDB 9.4 (2022-12-07)

No drug resistance mutations were found for PI.

Drug resistance interpretation: RT

HIVDB 9.4 (2022-12-07)

NRTI Mutations: None

NNRTI Mutations: **V106A** • **Y181C**

RT Other Mutations: K122E • F214L • A272P • K277R • I326V • A376T • K388R • A400T • P433L • **A446V** • N447S • D460N • S468T • S519N

#### Nucleoside Reverse Transcriptase Inhibitors

#### Non-nucleoside Reverse Transcriptase Inhibitors

|                            | Susceptible |                          | High-Level Resistance   |
|----------------------------|-------------|--------------------------|-------------------------|
| <b>abacavir (ABC)</b>      | Susceptible | <b>doravirine (DOR)</b>  | High-Level Resistance   |
| <b>zidovudine (AZT)</b>    | Susceptible | <b>efavirenz (EFV)</b>   | High-Level Resistance   |
| <b>emtricitabine (FTC)</b> | Susceptible | <b>etravirine (ETR)</b>  | Intermediate Resistance |
| <b>lamivudine (3TC)</b>    | Susceptible | <b>nevirapine (NVP)</b>  | High-Level Resistance   |
| <b>tenofovir (TDF)</b>     | Susceptible | <b>rilpivirine (RPV)</b> | Intermediate Resistance |

#### RT comments

##### NNRTI

- **V106A** is a non-polymorphic mutation that confers high-level resistance to NVP and DOR, and intermediate resistance to EFV. It is commonly selected in vitro and in vivo by DOR.
- **Y181C** is a non-polymorphic mutation selected in persons receiving NVP, ETR and RPV. It confers high-level resistance to NVP, intermediate resistance to ETR and RPV, and low-level resistance to EFV. It does not significantly reduce DOR susceptibility.
- This virus is predicted to have intermediate-level reduced susceptibility to **RPV**. The use of the combination of CAB/**RPV** should be considered to be contraindicated.

Mutation scoring: RT

HIVDB 9.4 (2022-12-07)

No drug resistance mutations were found for NRTI.

Drug resistance mutation scores of NNRTI:

| Rule  | DOR | EFV | ETR | NVP | RPV |
|-------|-----|-----|-----|-----|-----|
| V106A | 60  | 45  | 0   | 60  | 0   |
| Y181C | 10  | 30  | 30  | 60  | 45  |
| Total | 70  | 75  | 30  | 120 | 45  |

Drug resistance interpretation: IN

HIVDB 9.4 (2022-12-07)

INSTI Major Mutations: None

INSTI Accessory Mutations: None

IN Other Mutations: E10D • I72V • T125P • V126I • **A128P** • V151I

#### Integrase Strand Transfer Inhibitors

|                           |             |
|---------------------------|-------------|
| <b>bictegravir (BIC)</b>  | Susceptible |
| <b>cabotegravir (CAB)</b> | Susceptible |
| <b>dolutegravir (DTG)</b> | Susceptible |
| <b>elvitegravir (EVG)</b> | Susceptible |
| <b>raltegravir (RAL)</b>  | Susceptible |

#### IN comments

**Other**

- **V151I** is an accessory INSTI selected mutation that occurs in 1% to 3% of viruses from ART-naive persons depending on subtype. Alone, it appears to have little or no effect on INSTI susceptibility.

Mutation scoring: IN

HIVDB 9.4 (2022-12-07)

*No drug resistance mutations were found for INSTI.*

## 5. Y181C-H05

### Sequence summary

Sequence includes PR: codons 1 - 99  
Sequence includes RT: codons 1 - 560  
Sequence includes IN: codons 1 - 288 (missing: 129)  
Subtype: ☒ B (1.34%)  
PR SDRMs: None  
RT SDRMs: V106A, Y181C  
IN SDRMs: None

### Sequence quality assessment

#### Protease (PR)

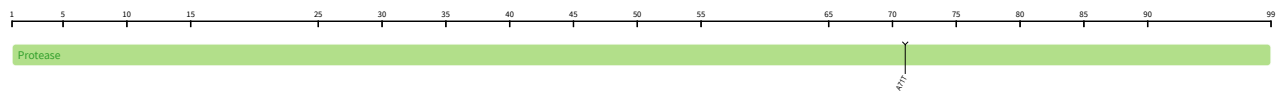

#### Reverse transcriptase (RT)

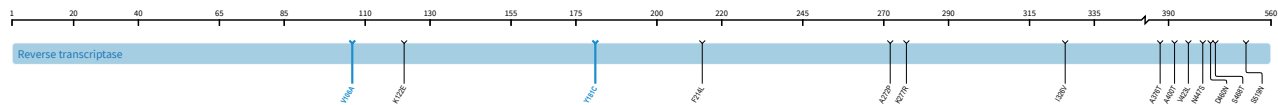

#### Integrase (IN)

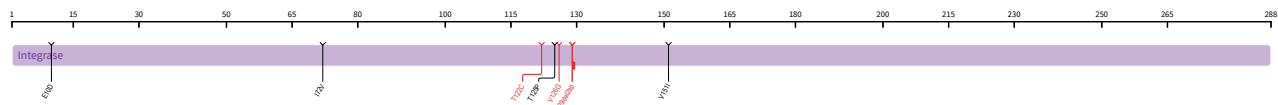

- **Warning:** The IN gene has a frameshift: 129del2bp.
- **Note:** One non-drug-resistance position was not sequenced or aligned: IN 129.

Drug resistance interpretation: PR

HIVDB 9.4 (2022-12-07)

PI Major Mutations: None  
PI Accessory Mutations: None  
PR Other Mutations: A71T

#### Protease Inhibitors

**atazanavir/r (ATV/r)** Susceptible  
**darunavir/r (DRV/r)** Susceptible  
**lopinavir/r (LPV/r)** Susceptible

**PR comments****Other**

- **A71V/T** are polymorphic, PI-selected accessory mutations that increase the replication of viruses with other PI-resistance mutations.

Mutation scoring: PR

HIVDB 9.4 (2022-12-07)

*No drug resistance mutations were found for PI.*

Drug resistance interpretation: RT

HIVDB 9.4 (2022-12-07)

NRTI Mutations: None  
 NNRTI Mutations: **V106A** • **Y181C**  
 RT Other Mutations: K122E • F214L • A272P • K277R • I326V • A376T • A400T • V423L • N447S • D460N • S468T • S519N

**Nucleoside Reverse Transcriptase Inhibitors****Non-nucleoside Reverse Transcriptase Inhibitors**

|                            |             |                          |                         |
|----------------------------|-------------|--------------------------|-------------------------|
| <b>abacavir (ABC)</b>      | Susceptible | <b>doravirine (DOR)</b>  | High-Level Resistance   |
| <b>zidovudine (AZT)</b>    | Susceptible | <b>efavirenz (EFV)</b>   | High-Level Resistance   |
| <b>emtricitabine (FTC)</b> | Susceptible | <b>etravirine (ETR)</b>  | Intermediate Resistance |
| <b>lamivudine (3TC)</b>    | Susceptible | <b>nevirapine (NVP)</b>  | High-Level Resistance   |
| <b>tenofovir (TDF)</b>     | Susceptible | <b>rilpivirine (RPV)</b> | Intermediate Resistance |

**RT comments****NNRTI**

- **V106A** is a non-polymorphic mutation that confers high-level resistance to NVP and DOR, and intermediate resistance to EFV. It is commonly selected in vitro and in vivo by DOR.
- **Y181C** is a non-polymorphic mutation selected in persons receiving NVP, ETR and RPV. It confers high-level resistance to NVP, intermediate resistance to ETR and RPV, and low-level resistance to EFV. It does not significantly reduce DOR susceptibility.
- This virus is predicted to have intermediate-level reduced susceptibility to **RPV**. The use of the combination of CAB/**RPV** should be considered to be contraindicated.

Mutation scoring: RT

HIVDB 9.4 (2022-12-07)

*No drug resistance mutations were found for NRTI.**Drug resistance mutation scores of NNRTI:*

| Rule  | DOR | EFV | ETR | NVP | RPV |
|-------|-----|-----|-----|-----|-----|
| V106A | 60  | 45  | 0   | 60  | 0   |
| Y181C | 10  | 30  | 30  | 60  | 45  |
| Total | 70  | 75  | 30  | 120 | 45  |

Drug resistance interpretation: IN

HIVDB 9.4 (2022-12-07)

INSTI Major Mutations: None  
 INSTI Accessory Mutations: None  
 IN Other Mutations: E10D • I72V • **T122C** • T125P • **V126G** • V151I

**Integrase Strand Transfer Inhibitors**

|                           |             |
|---------------------------|-------------|
| <b>bictegravir (BIC)</b>  | Susceptible |
| <b>cabotegravir (CAB)</b> | Susceptible |
| <b>dolutegravir (DTG)</b> | Susceptible |
| <b>elvitegravir (EVG)</b> | Susceptible |

**IN comments****Other**

- **V151I** is an accessory INSTI selected mutation that occurs in 1% to 3% of viruses from ART-naive persons depending on subtype. Alone, it appears to have little or no effect on INSTI susceptibility.

*No drug resistance mutations were found for INSTI.*

## 6. Y181C-H06

### Sequence summary

Sequence includes PR: codons 1 - 99  
Sequence includes RT: codons 1 - 560  
Sequence includes IN: codons 1 - 288 (missing: 47)  
Subtype: ☒ B (1.44%)  
PR SDRMs: None  
RT SDRMs: V106A, Y181C  
IN SDRMs: None

### Sequence quality assessment

#### Protease (PR)

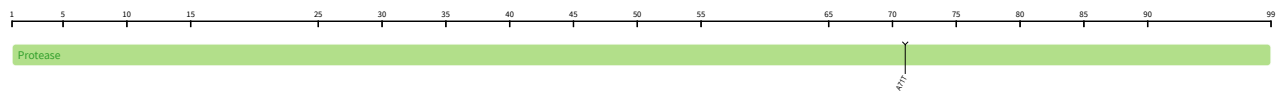

#### Reverse transcriptase (RT)

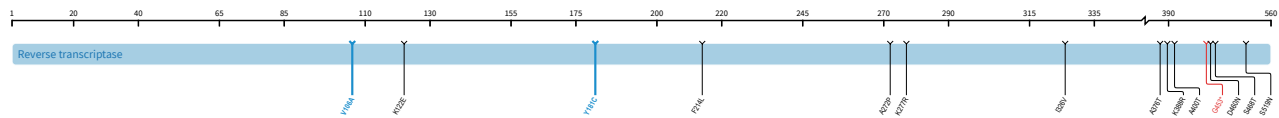

#### Integrase (IN)

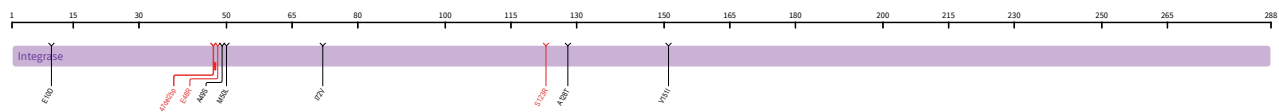

- **Warning:** The IN gene has a frameshift: 47del2bp.
- **Note:** One non-drug-resistance position was not sequenced or aligned: IN 47.
- **Note:** There is one stop codon in RT: RT:G453\*.

Drug resistance interpretation: PR

HIVDB 9.4 (2022-12-07)

PI Major Mutations: None  
PI Accessory Mutations: None  
PR Other Mutations: A71T

#### Protease Inhibitors

**atazanavir/r (ATV/r)** Susceptible  
**darunavir/r (DRV/r)** Susceptible  
**lopinavir/r (LPV/r)** Susceptible



**PR comments****Other**

- **A71V/T** are polymorphic, PI-selected accessory mutations that increase the replication of viruses with other PI-resistance mutations.

Mutation scoring: PR

HIVDB 9.4 (2022-12-07)

*No drug resistance mutations were found for PI.*

Drug resistance interpretation: RT

HIVDB 9.4 (2022-12-07)

NRTI Mutations:

None

NNRTI Mutations:

**V106A** • **Y181C**

RT Other Mutations:

K122E • F214L • A272P • K277R • I326V • A376T • K388R • A400T • **G453\*** • D460N • S468T • S519N**Nucleoside Reverse Transcriptase Inhibitors****Non-nucleoside Reverse Transcriptase Inhibitors**

|                            |             |                          |                         |
|----------------------------|-------------|--------------------------|-------------------------|
| <b>abacavir (ABC)</b>      | Susceptible | <b>doravirine (DOR)</b>  | High-Level Resistance   |
| <b>zidovudine (AZT)</b>    | Susceptible | <b>efavirenz (EFV)</b>   | High-Level Resistance   |
| <b>emtricitabine (FTC)</b> | Susceptible | <b>etravirine (ETR)</b>  | Intermediate Resistance |
| <b>lamivudine (3TC)</b>    | Susceptible | <b>nevirapine (NVP)</b>  | High-Level Resistance   |
| <b>tenofovir (TDF)</b>     | Susceptible | <b>rilpivirine (RPV)</b> | Intermediate Resistance |

**RT comments****NNRTI**

- **V106A** is a non-polymorphic mutation that confers high-level resistance to NVP and DOR, and intermediate resistance to EFV. It is commonly selected in vitro and in vivo by DOR.
- **Y181C** is a non-polymorphic mutation selected in persons receiving NVP, ETR and RPV. It confers high-level resistance to NVP, intermediate resistance to ETR and RPV, and low-level resistance to EFV. It does not significantly reduce DOR susceptibility.
- This virus is predicted to have intermediate-level reduced susceptibility to **RPV**. The use of the combination of CAB/**RPV** should be considered to be contraindicated.

Mutation scoring: RT

HIVDB 9.4 (2022-12-07)

*No drug resistance mutations were found for NRTI.**Drug resistance mutation scores of NNRTI:*

| Rule  | DOR | EFV | ETR | NVP | RPV |
|-------|-----|-----|-----|-----|-----|
| V106A | 60  | 45  | 0   | 60  | 0   |
| Y181C | 10  | 30  | 30  | 60  | 45  |
| Total | 70  | 75  | 30  | 120 | 45  |

Drug resistance interpretation: IN

HIVDB 9.4 (2022-12-07)

INSTI Major Mutations:

None

INSTI Accessory Mutations:

A128T

IN Other Mutations:

E10D • **E48R** • A49S • M50L • I72V • **S123R** • V151I**Integrase Strand Transfer Inhibitors**

|                           |             |
|---------------------------|-------------|
| <b>bictegravir (BIC)</b>  | Susceptible |
| <b>cabotegravir (CAB)</b> | Susceptible |
| <b>dolutegravir (DTG)</b> | Susceptible |
| <b>elvitegravir (EVG)</b> | Susceptible |

**IN comments****Accessory**

- **A128T** is a relatively nonpolymorphic possible INSTI-selected mutation, which does not appear to reduce INSTI susceptibility.

**Other**

- **V151I** is an accessory INSTI selected mutation that occurs in 1% to 3% of viruses from ART-naive persons depending on subtype. Alone, it appears to have little or no effect on INSTI susceptibility.

Mutation scoring: IN

HIVDB 9.4 (2022-12-07)

*No drug resistance mutations were found for INSTI.*

## 7. Y181C-H07

### Sequence summary

Sequence includes PR: codons 1 - 99  
Sequence includes RT: codons 1 - 560  
Sequence includes IN: codons 1 - 288  
Subtype: **B** (1.37%)  
PR SDRMs: None  
RT SDRMs: Y181C  
IN SDRMs: None

### Sequence quality assessment

#### Protease (PR)



#### Reverse transcriptase (RT)

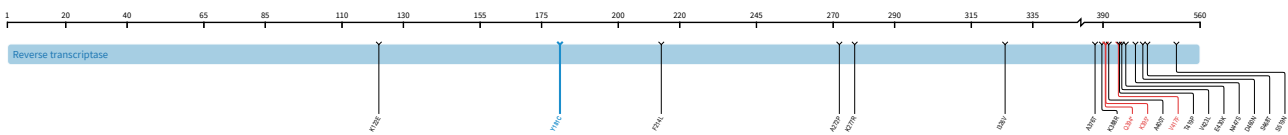

#### Integrase (IN)

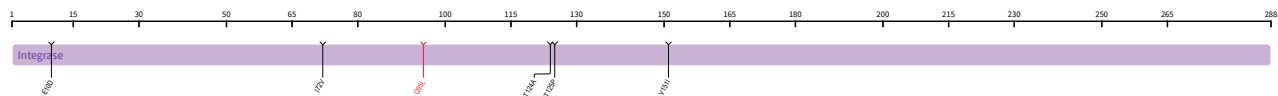

- **Severe warning:** There are 2 stop codons in RT: RT:Q394\*, RT:K395\*.
- **Note:** There are 3 unusual mutations in RT: Q394\*, K395\*, V417F.
- **Note:** There is one unusual mutation at a drug-resistance position in IN: Q95L.

Drug resistance interpretation: PR

HIVDB 9.4 (2022-12-07)

PI Major Mutations: None  
PI Accessory Mutations: None  
PR Other Mutations: A71T

#### Protease Inhibitors

**atazanavir/r (ATV/r)** Susceptible  
**darunavir/r (DRV/r)** Susceptible  
**lopinavir/r (LPV/r)** Susceptible

**PR comments****Other**

- **A71V/T** are polymorphic, PI-selected accessory mutations that increase the replication of viruses with other PI-resistance mutations.

Mutation scoring: PR

HIVDB 9.4 (2022-12-07)

*No drug resistance mutations were found for PI.*

Drug resistance interpretation: RT

HIVDB 9.4 (2022-12-07)

NRTI Mutations: None

NNRTI Mutations: **Y181C**RT Other Mutations: K122E • F214L • A272P • K277R • I326V • A376T • K388R • **Q394\*** • **K395\*** • A400T • **V417F** • T419P • V423L • **E430K** • N447S • D460N • S468T • S519N**Nucleoside Reverse Transcriptase Inhibitors****Non-nucleoside Reverse Transcriptase Inhibitors**

|                            |             |                          |                                |
|----------------------------|-------------|--------------------------|--------------------------------|
| <b>abacavir (ABC)</b>      | Susceptible | <b>doravirine (DOR)</b>  | Potential Low-Level Resistance |
| <b>zidovudine (AZT)</b>    | Susceptible | <b>efavirenz (EFV)</b>   | Intermediate Resistance        |
| <b>emtricitabine (FTC)</b> | Susceptible | <b>etravirine (ETR)</b>  | Intermediate Resistance        |
| <b>lamivudine (3TC)</b>    | Susceptible | <b>nevirapine (NVP)</b>  | High-Level Resistance          |
| <b>tenofovir (TDF)</b>     | Susceptible | <b>rilpivirine (RPV)</b> | Intermediate Resistance        |

**RT comments****NNRTI**

- **Y181C** is a non-polymorphic mutation selected in persons receiving NVP, ETR and RPV. It confers high-level resistance to NVP, intermediate resistance to ETR and RPV, and low-level resistance to EFV. It does not significantly reduce DOR susceptibility.
- This virus is predicted to have intermediate-level reduced susceptibility to **RPV**. The use of the combination of CAB/**RPV** should be considered to be contraindicated.

Mutation scoring: RT

HIVDB 9.4 (2022-12-07)

*No drug resistance mutations were found for NRTI.**Drug resistance mutation scores of NNRTI:*

| Rule  | DOR | EFV | ETR | NVP | RPV |
|-------|-----|-----|-----|-----|-----|
| Y181C | 10  | 30  | 30  | 60  | 45  |

Drug resistance interpretation: IN

HIVDB 9.4 (2022-12-07)

INSTI Major Mutations: None

INSTI Accessory Mutations: None

IN Other Mutations: E10D • I72V • **Q95L** • T124A • T125P • V151I**Integrase Strand Transfer Inhibitors**

|                           |             |
|---------------------------|-------------|
| <b>bictegravir (BIC)</b>  | Susceptible |
| <b>cabotegravir (CAB)</b> | Susceptible |
| <b>dolutegravir (DTG)</b> | Susceptible |
| <b>elvitegravir (EVG)</b> | Susceptible |
| <b>raltegravir (RAL)</b>  | Susceptible |

**IN comments**

**Other**

- **V151I** is an accessory INSTI selected mutation that occurs in 1% to 3% of viruses from ART-naive persons depending on subtype. Alone, it appears to have little or no effect on INSTI susceptibility.

Mutation scoring: IN

HIVDB 9.4 (2022-12-07)

*No drug resistance mutations were found for INSTI.*

## 8. Y181C-H08

### Sequence summary

Sequence includes PR: codons 1 - 99  
Sequence includes RT: codons 1 - 560  
Sequence includes IN: codons 1 - 288  
Subtype: ☒ B (1.27%)  
PR SDRMs: None  
RT SDRMs: V106A, Y181C  
IN SDRMs: None

### Sequence quality assessment

#### Protease (PR)

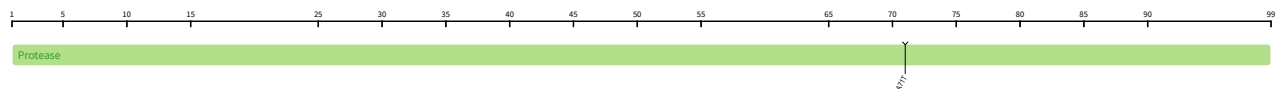

#### Reverse transcriptase (RT)

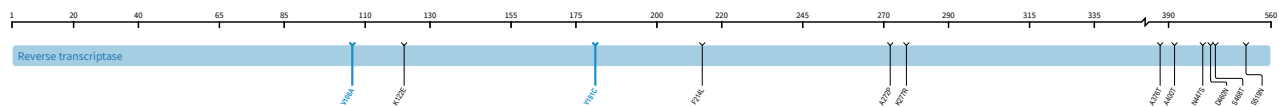

#### Integrase (IN)

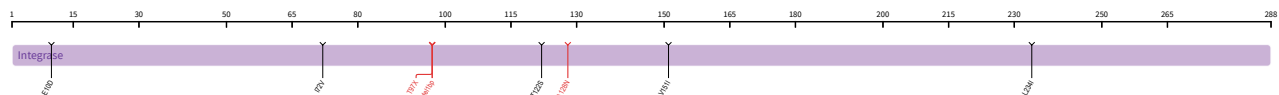

- **Warning:** The IN gene has a frameshift: 97del1bp.
- **Note:** There is one unusual mutation at a drug-resistance position in IN: T97X.

Drug resistance interpretation: PR

HIVDB 9.4 (2022-12-07)

PI Major Mutations: None  
PI Accessory Mutations: None  
PR Other Mutations: A71T

#### Protease Inhibitors

**atazanavir/r (ATV/r)** Susceptible  
**darunavir/r (DRV/r)** Susceptible  
**lopinavir/r (LPV/r)** Susceptible

**PR comments****Other**

- **A71V/T** are polymorphic, PI-selected accessory mutations that increase the replication of viruses with other PI-resistance mutations.

Mutation scoring: PR

HIVDB 9.4 (2022-12-07)

*No drug resistance mutations were found for PI.*

Drug resistance interpretation: RT

HIVDB 9.4 (2022-12-07)

NRTI Mutations: None  
 NNRTI Mutations: **V106A** • **Y181C**  
 RT Other Mutations: K122E • F214L • A272P • K277R • A376T • A400T • N447S • D460N • S468T • S519N

**Nucleoside Reverse Transcriptase Inhibitors****Non-nucleoside Reverse Transcriptase Inhibitors**

|                            |             |                          |                         |
|----------------------------|-------------|--------------------------|-------------------------|
| <b>abacavir (ABC)</b>      | Susceptible | <b>doravirine (DOR)</b>  | High-Level Resistance   |
| <b>zidovudine (AZT)</b>    | Susceptible | <b>efavirenz (EFV)</b>   | High-Level Resistance   |
| <b>emtricitabine (FTC)</b> | Susceptible | <b>etravirine (ETR)</b>  | Intermediate Resistance |
| <b>lamivudine (3TC)</b>    | Susceptible | <b>nevirapine (NVP)</b>  | High-Level Resistance   |
| <b>tenofovir (TDF)</b>     | Susceptible | <b>rilpivirine (RPV)</b> | Intermediate Resistance |

**RT comments****NNRTI**

- **V106A** is a non-polymorphic mutation that confers high-level resistance to NVP and DOR, and intermediate resistance to EFV. It is commonly selected in vitro and in vivo by DOR.
- **Y181C** is a non-polymorphic mutation selected in persons receiving NVP, ETR and RPV. It confers high-level resistance to NVP, intermediate resistance to ETR and RPV, and low-level resistance to EFV. It does not significantly reduce DOR susceptibility.
- This virus is predicted to have intermediate-level reduced susceptibility to **RPV**. The use of the combination of CAB/**RPV** should be considered to be contraindicated.

Mutation scoring: RT

HIVDB 9.4 (2022-12-07)

*No drug resistance mutations were found for NRTI.**Drug resistance mutation scores of NNRTI:*

| Rule  | DOR | EFV | ETR | NVP | RPV |
|-------|-----|-----|-----|-----|-----|
| V106A | 60  | 45  | 0   | 60  | 0   |
| Y181C | 10  | 30  | 30  | 60  | 45  |
| Total | 70  | 75  | 30  | 120 | 45  |

Drug resistance interpretation: IN

HIVDB 9.4 (2022-12-07)

INSTI Major Mutations: None  
 INSTI Accessory Mutations: None  
 IN Other Mutations: E10D • I72V • **T97X** • T122S • **A128N** • V151I • L234I

**Integrase Strand Transfer Inhibitors**

|                           |             |
|---------------------------|-------------|
| <b>bictegravir (BIC)</b>  | Susceptible |
| <b>cabotegravir (CAB)</b> | Susceptible |
| <b>dolutegravir (DTG)</b> | Susceptible |
| <b>elvitegravir (EVG)</b> | Susceptible |

**IN comments****Other**

- **V151I** is an accessory INSTI selected mutation that occurs in 1% to 3% of viruses from ART-naive persons depending on subtype. Alone, it appears to have little or no effect on INSTI susceptibility.

*No drug resistance mutations were found for INSTI.*



## 9. Y181C-H09

### Sequence summary

Sequence includes PR: codons 1 - 99  
Sequence includes RT: codons 1 - 560  
Sequence includes IN: codons 1 - 288  
Subtype: ☒ B (1.34%)  
PR SDRMs: None  
RT SDRMs: V106A, Y181C  
IN SDRMs: None

### Sequence quality assessment

#### Protease (PR)

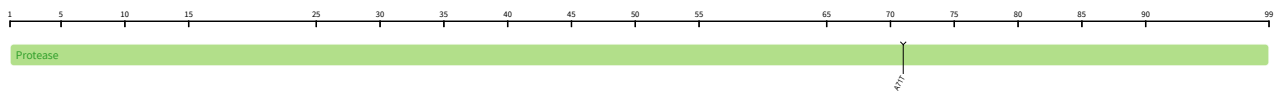

#### Reverse transcriptase (RT)

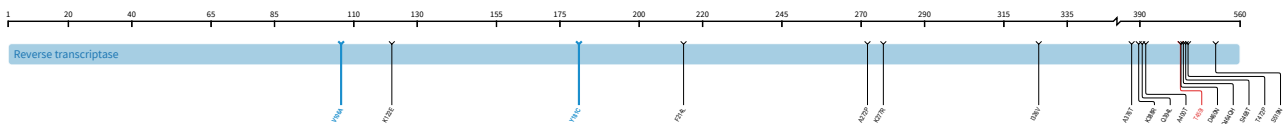

#### Integrase (IN)

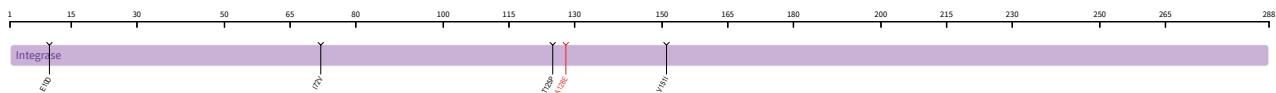

*There are no known sequence quality issues.*

Drug resistance interpretation: PR

HIVDB 9.4 (2022-12-07)

PI Major Mutations: None  
PI Accessory Mutations: None  
PR Other Mutations: A71T

#### Protease Inhibitors

**atazanavir/r (ATV/r)** Susceptible  
**darunavir/r (DRV/r)** Susceptible  
**lopinavir/r (LPV/r)** Susceptible

#### PR comments

**Other**

- **A71V/T** are polymorphic, PI-selected accessory mutations that increase the replication of viruses with other PI-resistance mutations.

Mutation scoring: PR

HIVDB 9.4 (2022-12-07)

*No drug resistance mutations were found for PI.*

Drug resistance interpretation: RT

HIVDB 9.4 (2022-12-07)

NRTI Mutations: None

NNRTI Mutations: **V106A** • **Y181C**RT Other Mutations: K122E • F214L • A272P • K277R • I326V • A376T • K388R • Q394L • A400T • **T459I** • D460N • Q464QH • S468T • T472P • S519N**Nucleoside Reverse Transcriptase Inhibitors****Non-nucleoside Reverse Transcriptase Inhibitors**

|                            |             |                          |                         |
|----------------------------|-------------|--------------------------|-------------------------|
| <b>abacavir (ABC)</b>      | Susceptible | <b>doravirine (DOR)</b>  | High-Level Resistance   |
| <b>zidovudine (AZT)</b>    | Susceptible | <b>efavirenz (EFV)</b>   | High-Level Resistance   |
| <b>emtricitabine (FTC)</b> | Susceptible | <b>etravirine (ETR)</b>  | Intermediate Resistance |
| <b>lamivudine (3TC)</b>    | Susceptible | <b>nevirapine (NVP)</b>  | High-Level Resistance   |
| <b>tenofovir (TDF)</b>     | Susceptible | <b>rilpivirine (RPV)</b> | Intermediate Resistance |

**RT comments****NNRTI**

- **V106A** is a non-polymorphic mutation that confers high-level resistance to NVP and DOR, and intermediate resistance to EFV. It is commonly selected in vitro and in vivo by DOR.
- **Y181C** is a non-polymorphic mutation selected in persons receiving NVP, ETR and RPV. It confers high-level resistance to NVP, intermediate resistance to ETR and RPV, and low-level resistance to EFV. It does not significantly reduce DOR susceptibility.
- This virus is predicted to have intermediate-level reduced susceptibility to **RPV**. The use of the combination of CAB/**RPV** should be considered to be contraindicated.

Mutation scoring: RT

HIVDB 9.4 (2022-12-07)

*No drug resistance mutations were found for NRTI.**Drug resistance mutation scores of NNRTI:*

| Rule  | DOR | EFV | ETR | NVP | RPV |
|-------|-----|-----|-----|-----|-----|
| V106A | 60  | 45  | 0   | 60  | 0   |
| Y181C | 10  | 30  | 30  | 60  | 45  |
| Total | 70  | 75  | 30  | 120 | 45  |

Drug resistance interpretation: IN

HIVDB 9.4 (2022-12-07)

INSTI Major Mutations: None

INSTI Accessory Mutations: None

IN Other Mutations: E10D • I72V • T125P • **A128E** • V151I**Integrase Strand Transfer Inhibitors**

|                           |             |
|---------------------------|-------------|
| <b>bictegravir (BIC)</b>  | Susceptible |
| <b>cabotegravir (CAB)</b> | Susceptible |
| <b>dolutegravir (DTG)</b> | Susceptible |
| <b>elvitegravir (EVG)</b> | Susceptible |
| <b>raltegravir (RAL)</b>  | Susceptible |

**IN comments****Other**

- **V151I** is an accessory INSTI selected mutation that occurs in 1% to 3% of viruses from ART-naive persons depending on subtype. Alone, it appears to have little or no effect on INSTI susceptibility.

Mutation scoring: IN

HIVDB 9.4 (2022-12-07)

*No drug resistance mutations were found for INSTI.*

## 10. Y181C-H10

### Sequence summary

Sequence includes PR: codons 1 - 99  
Sequence includes RT: codons 1 - 560  
Sequence includes IN: codons 1 - 288  
Subtype: ☒ B (1.34%)  
PR SDRMs: None  
RT SDRMs: V106A, Y181C  
IN SDRMs: None

### Sequence quality assessment

#### Protease (PR)

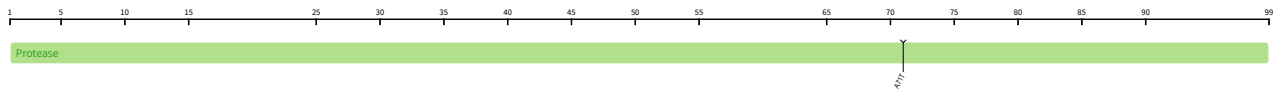

#### Reverse transcriptase (RT)

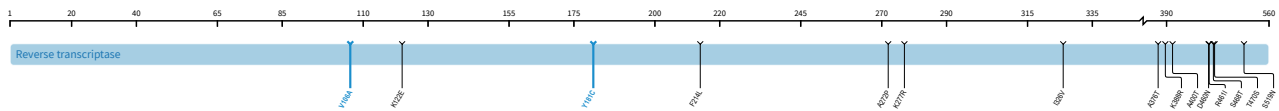

#### Integrase (IN)

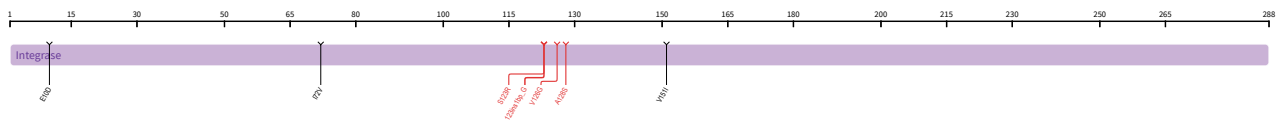

- **Warning:** The IN gene has a frameshift: 123ins1bp\_G.
- **Note:** There are 3 unusual mutations in IN: S123R, V126G, A128S.

Drug resistance interpretation: PR

HIVDB 9.4 (2022-12-07)

PI Major Mutations: None  
PI Accessory Mutations: None  
PR Other Mutations: A71T

#### Protease Inhibitors

**atazanavir/r (ATV/r)** Susceptible  
**darunavir/r (DRV/r)** Susceptible  
**lopinavir/r (LPV/r)** Susceptible

**PR comments****Other**

- **A71V/T** are polymorphic, PI-selected accessory mutations that increase the replication of viruses with other PI-resistance mutations.

Mutation scoring: PR

HIVDB 9.4 (2022-12-07)

*No drug resistance mutations were found for PI.*

Drug resistance interpretation: RT

HIVDB 9.4 (2022-12-07)

NRTI Mutations:

None

NNRTI Mutations:

**V106A** • **Y181C**

RT Other Mutations:

K122E • F214L • A272P • K277R • I326V • A376T • K388R • A400T • D460N • R461I • S468T • T470S • S519N

**Nucleoside Reverse Transcriptase Inhibitors****Non-nucleoside Reverse Transcriptase Inhibitors**

|                            |             |                          |                         |
|----------------------------|-------------|--------------------------|-------------------------|
| <b>abacavir (ABC)</b>      | Susceptible | <b>doravirine (DOR)</b>  | High-Level Resistance   |
| <b>zidovudine (AZT)</b>    | Susceptible | <b>efavirenz (EFV)</b>   | High-Level Resistance   |
| <b>emtricitabine (FTC)</b> | Susceptible | <b>etravirine (ETR)</b>  | Intermediate Resistance |
| <b>lamivudine (3TC)</b>    | Susceptible | <b>nevirapine (NVP)</b>  | High-Level Resistance   |
| <b>tenofovir (TDF)</b>     | Susceptible | <b>rilpivirine (RPV)</b> | Intermediate Resistance |

**RT comments****NNRTI**

- **V106A** is a non-polymorphic mutation that confers high-level resistance to NVP and DOR, and intermediate resistance to EFV. It is commonly selected in vitro and in vivo by DOR.
- **Y181C** is a non-polymorphic mutation selected in persons receiving NVP, ETR and RPV. It confers high-level resistance to NVP, intermediate resistance to ETR and RPV, and low-level resistance to EFV. It does not significantly reduce DOR susceptibility.
- This virus is predicted to have intermediate-level reduced susceptibility to **RPV**. The use of the combination of CAB/**RPV** should be considered to be contraindicated.

Mutation scoring: RT

HIVDB 9.4 (2022-12-07)

*No drug resistance mutations were found for NRTI.**Drug resistance mutation scores of NNRTI:*

| Rule  | DOR | EFV | ETR | NVP | RPV |
|-------|-----|-----|-----|-----|-----|
| V106A | 60  | 45  | 0   | 60  | 0   |
| Y181C | 10  | 30  | 30  | 60  | 45  |
| Total | 70  | 75  | 30  | 120 | 45  |

Drug resistance interpretation: IN

HIVDB 9.4 (2022-12-07)

INSTI Major Mutations:

None

INSTI Accessory Mutations:

None

IN Other Mutations:

E10D • I72V • **S123R** • **V126G** • **A128S** • V151I**Integrase Strand Transfer Inhibitors**

|                           |             |
|---------------------------|-------------|
| <b>bictegravir (BIC)</b>  | Susceptible |
| <b>cabotegravir (CAB)</b> | Susceptible |
| <b>dolutegravir (DTG)</b> | Susceptible |
| <b>elvitegravir (EVG)</b> | Susceptible |

**IN comments****Other**

- **V151I** is an accessory INSTI selected mutation that occurs in 1% to 3% of viruses from ART-naive persons depending on subtype. Alone, it appears to have little or no effect on INSTI susceptibility.

*No drug resistance mutations were found for INSTI.*

# 11. Y181C-H11

## Sequence summary

Sequence includes PR: codons 1 - 99  
Sequence includes RT: codons 1 - 560  
Sequence includes IN: codons 1 - 288  
Subtype: ☒ B (1.16%)  
PR SDRMs: None  
RT SDRMs: V106A, Y181C  
IN SDRMs: None

## Sequence quality assessment

### Protease (PR)

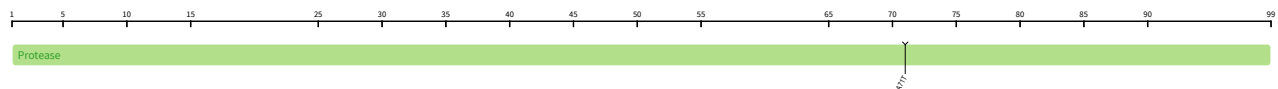

### Reverse transcriptase (RT)

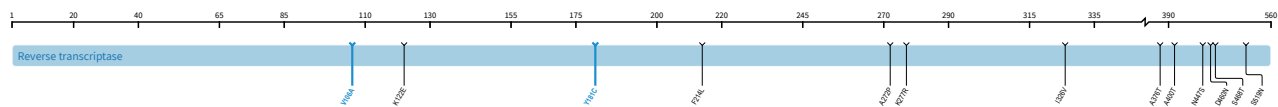

### Integrase (IN)

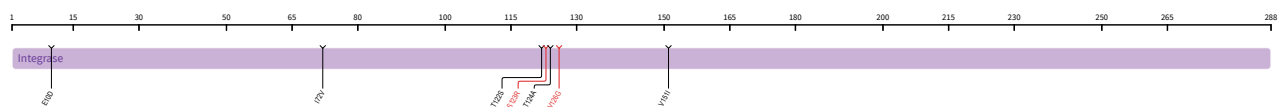

There are no known sequence quality issues.

Drug resistance interpretation: PR

HIVDB 9.4 (2022-12-07)

PI Major Mutations: None  
PI Accessory Mutations: None  
PR Other Mutations: A71T

#### Protease Inhibitors

atazanavir/r (ATV/r) Susceptible  
darunavir/r (DRV/r) Susceptible  
lopinavir/r (LPV/r) Susceptible

#### PR comments

Other

- **A71V/T** are polymorphic, PI-selected accessory mutations that increase the replication of viruses with other PI-resistance mutations.

Mutation scoring: PR

HIVDB 9.4 (2022-12-07)

No drug resistance mutations were found for PI.

Drug resistance interpretation: RT

HIVDB 9.4 (2022-12-07)

NRTI Mutations:

None

NNRTI Mutations:

**V106A** • **Y181C**

RT Other Mutations:

K122E • F214L • A272P • K277R • I326V • A376T • A400T • N447S • D460N • S468T • S519N

#### Nucleoside Reverse Transcriptase Inhibitors

#### Non-nucleoside Reverse Transcriptase Inhibitors

|                            | Susceptible |                          | High-Level Resistance   |
|----------------------------|-------------|--------------------------|-------------------------|
| <b>abacavir (ABC)</b>      | Susceptible | <b>doravirine (DOR)</b>  | High-Level Resistance   |
| <b>zidovudine (AZT)</b>    | Susceptible | <b>efavirenz (EFV)</b>   | High-Level Resistance   |
| <b>emtricitabine (FTC)</b> | Susceptible | <b>etravirine (ETR)</b>  | Intermediate Resistance |
| <b>lamivudine (3TC)</b>    | Susceptible | <b>nevirapine (NVP)</b>  | High-Level Resistance   |
| <b>tenofovir (TDF)</b>     | Susceptible | <b>rilpivirine (RPV)</b> | Intermediate Resistance |

#### RT comments

##### NNRTI

- **V106A** is a non-polymorphic mutation that confers high-level resistance to NVP and DOR, and intermediate resistance to EFV. It is commonly selected in vitro and in vivo by DOR.
- **Y181C** is a non-polymorphic mutation selected in persons receiving NVP, ETR and RPV. It confers high-level resistance to NVP, intermediate resistance to ETR and RPV, and low-level resistance to EFV. It does not significantly reduce DOR susceptibility.
- This virus is predicted to have intermediate-level reduced susceptibility to **RPV**. The use of the combination of CAB/**RPV** should be considered to be contraindicated.

Mutation scoring: RT

HIVDB 9.4 (2022-12-07)

No drug resistance mutations were found for NRTI.

Drug resistance mutation scores of NNRTI:

| Rule  | DOR | EFV | ETR | NVP | RPV |
|-------|-----|-----|-----|-----|-----|
| V106A | 60  | 45  | 0   | 60  | 0   |
| Y181C | 10  | 30  | 30  | 60  | 45  |
| Total | 70  | 75  | 30  | 120 | 45  |

Drug resistance interpretation: IN

HIVDB 9.4 (2022-12-07)

INSTI Major Mutations:

None

INSTI Accessory Mutations:

None

IN Other Mutations:

E10D • I72V • T122S • **S123R** • T124A • **V126G** • V151I

#### Integrase Strand Transfer Inhibitors

|                           |             |
|---------------------------|-------------|
| <b>bictegravir (BIC)</b>  | Susceptible |
| <b>cabotegravir (CAB)</b> | Susceptible |
| <b>dolutegravir (DTG)</b> | Susceptible |
| <b>elvitegravir (EVG)</b> | Susceptible |
| <b>raltegravir (RAL)</b>  | Susceptible |

#### IN comments



**Other**

- **V151I** is an accessory INSTI selected mutation that occurs in 1% to 3% of viruses from ART-naive persons depending on subtype. Alone, it appears to have little or no effect on INSTI susceptibility.

Mutation scoring: IN

HIVDB 9.4 (2022-12-07)

*No drug resistance mutations were found for INSTI.*

## 12. Y181C-H12

### Sequence summary

Sequence includes PR: codons 1 - 99  
Sequence includes RT: codons 1 - 560  
Sequence includes IN: codons 1 - 288  
Subtype: ☒ B (1.48%)  
PR SDRMs: None  
RT SDRMs: V106A, Y181C  
IN SDRMs: None

### Sequence quality assessment

#### Protease (PR)



#### Reverse transcriptase (RT)

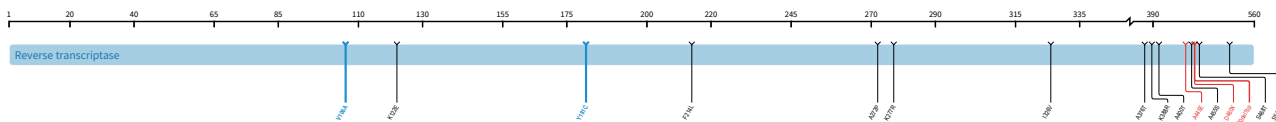

#### Integrase (IN)

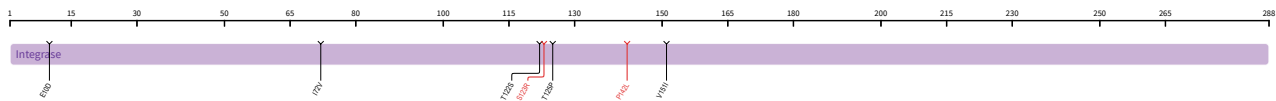

- **Warning:** The RT gene has a frameshift: 460del1bp.

Drug resistance interpretation: PR

HIVDB 9.4 (2022-12-07)

PI Major Mutations: None  
PI Accessory Mutations: None  
PR Other Mutations: A71T

#### Protease Inhibitors

**atazanavir/r (ATV/r)** Susceptible  
**darunavir/r (DRV/r)** Susceptible  
**lopinavir/r (LPV/r)** Susceptible

**PR comments****Other**

- **A71V/T** are polymorphic, PI-selected accessory mutations that increase the replication of viruses with other PI-resistance mutations.

Mutation scoring: PR

HIVDB 9.4 (2022-12-07)

*No drug resistance mutations were found for PI.*

Drug resistance interpretation: RT

HIVDB 9.4 (2022-12-07)

NRTI Mutations: None

NNRTI Mutations: **V106A** • **Y181C**RT Other Mutations: K122E • F214L • A272P • K277R • I326V • A376T • K388R • A400T • **A445E** • A455S • **D460X** • S468T • S519N**Nucleoside Reverse Transcriptase Inhibitors****Non-nucleoside Reverse Transcriptase Inhibitors**

|                            |             |                          |                         |
|----------------------------|-------------|--------------------------|-------------------------|
| <b>abacavir (ABC)</b>      | Susceptible | <b>doravirine (DOR)</b>  | High-Level Resistance   |
| <b>zidovudine (AZT)</b>    | Susceptible | <b>efavirenz (EFV)</b>   | High-Level Resistance   |
| <b>emtricitabine (FTC)</b> | Susceptible | <b>etravirine (ETR)</b>  | Intermediate Resistance |
| <b>lamivudine (3TC)</b>    | Susceptible | <b>nevirapine (NVP)</b>  | High-Level Resistance   |
| <b>tenofovir (TDF)</b>     | Susceptible | <b>rilpivirine (RPV)</b> | Intermediate Resistance |

**RT comments****NNRTI**

- **V106A** is a non-polymorphic mutation that confers high-level resistance to NVP and DOR, and intermediate resistance to EFV. It is commonly selected in vitro and in vivo by DOR.
- **Y181C** is a non-polymorphic mutation selected in persons receiving NVP, ETR and RPV. It confers high-level resistance to NVP, intermediate resistance to ETR and RPV, and low-level resistance to EFV. It does not significantly reduce DOR susceptibility.
- This virus is predicted to have intermediate-level reduced susceptibility to **RPV**. The use of the combination of CAB/**RPV** should be considered to be contraindicated.

Mutation scoring: RT

HIVDB 9.4 (2022-12-07)

*No drug resistance mutations were found for NRTI.**Drug resistance mutation scores of NNRTI:*

| Rule  | DOR | EFV | ETR | NVP | RPV |
|-------|-----|-----|-----|-----|-----|
| V106A | 60  | 45  | 0   | 60  | 0   |
| Y181C | 10  | 30  | 30  | 60  | 45  |
| Total | 70  | 75  | 30  | 120 | 45  |

Drug resistance interpretation: IN

HIVDB 9.4 (2022-12-07)

INSTI Major Mutations: None

INSTI Accessory Mutations: None

IN Other Mutations: E10D • I72V • T122S • **S123R** • T125P • **P142L** • V151I**Integrase Strand Transfer Inhibitors**

|                           |             |
|---------------------------|-------------|
| <b>bictegravir (BIC)</b>  | Susceptible |
| <b>cabotegravir (CAB)</b> | Susceptible |
| <b>dolutegravir (DTG)</b> | Susceptible |
| <b>elvitegravir (EVG)</b> | Susceptible |

**IN comments****Other**

- **V151I** is an accessory INSTI selected mutation that occurs in 1% to 3% of viruses from ART-naive persons depending on subtype. Alone, it appears to have little or no effect on INSTI susceptibility.

Mutation scoring: IN

HIVDB 9.4 (2022-12-07)

*No drug resistance mutations were found for INSTI.*
